# Supplementary material for: The complete genome sequences of poxviruses isolated from a penguin and a pigeon in South Africa and comparison to other sequenced avipoxviruses
Source: PubMed Central journal article supplement (PMC4229897; doi:10.1186/1471-2164-15-463), 2014-06-12

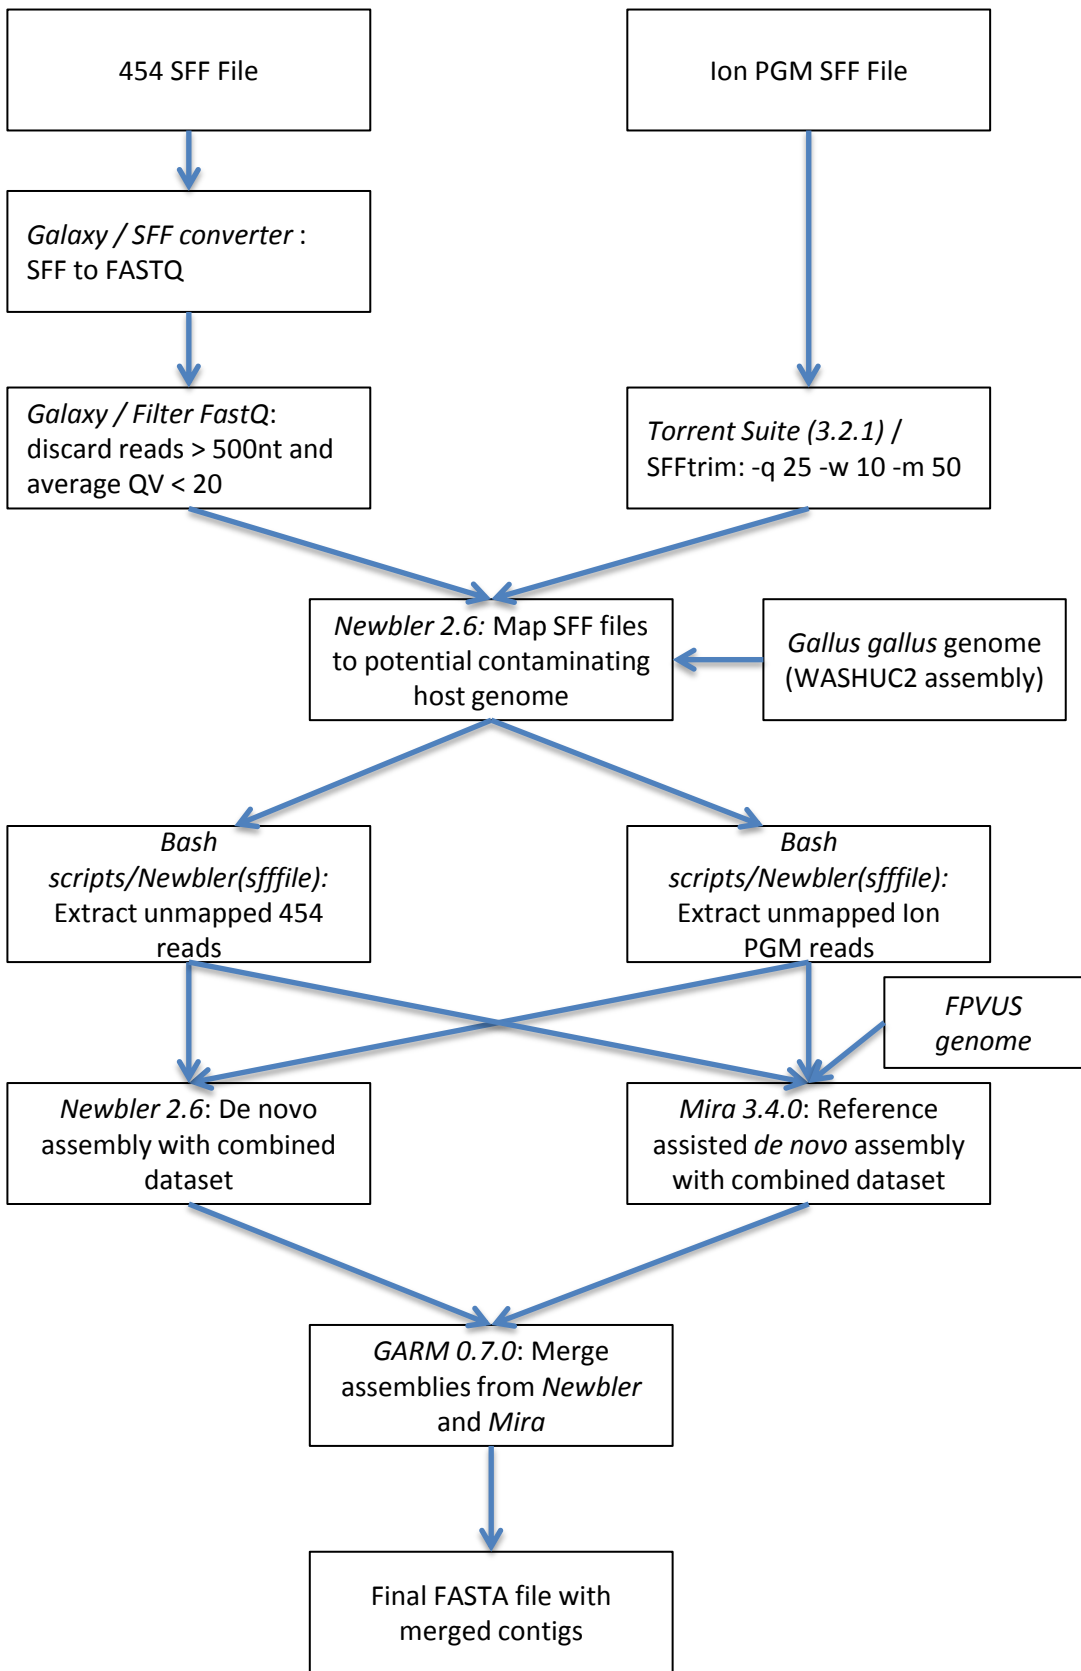

Supplement: 1471-2164-15-463-S2.pdf [file 1471-2164-15-463-S2.pdf]
